# Supplementary material for: Distinct Regulation of Bioenergetics and Translation by Group I mGluR and NMDAR
Source: bioRxiv or medRxiv preprint supplement (doi:10.1101/552638), 2020-03-30
Supplement: Supplementary file [file media-1.pdf]

Supplementary Information

Supplementary Figure 1:

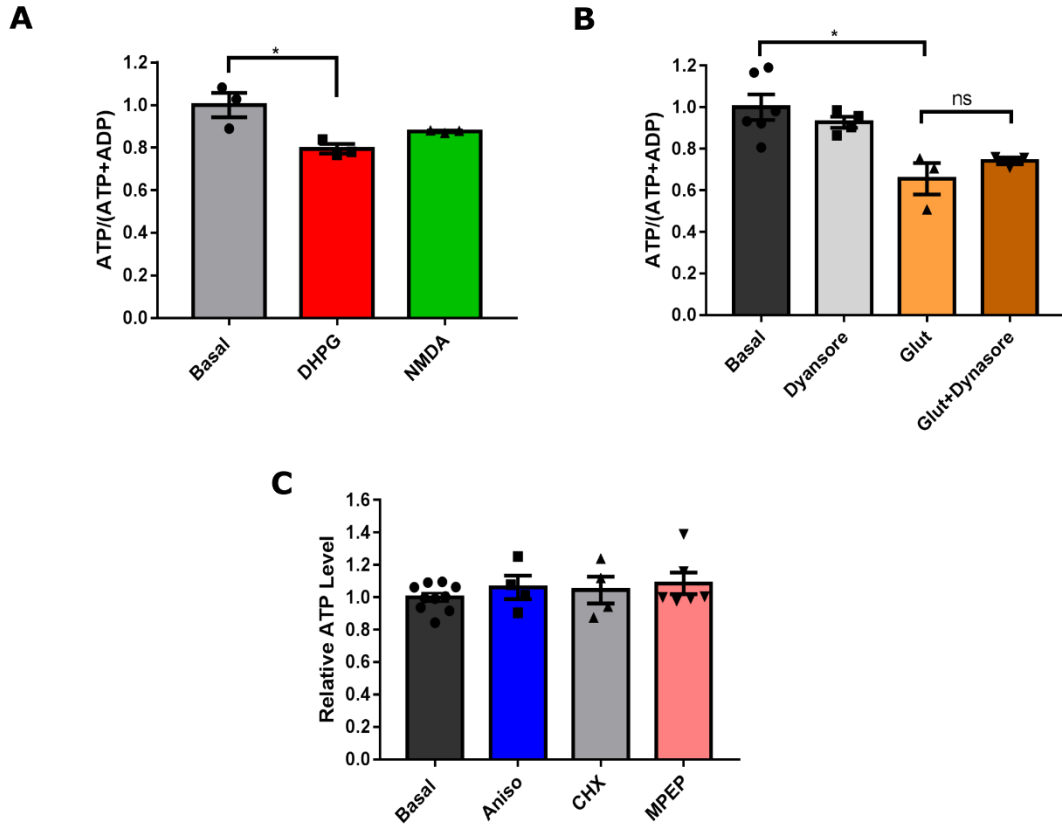

Quantifying Activity Dependent Changes in Energy Level. (Related to Figure 1)

(A) Bar graph representing normalized average value of neuronal ATP/ATP+ADP ratio in basal condition and on DHPG (50 $\mu$ M) and NMDA (20 $\mu$ M) treatment for 5 minutes. \* $p$ <0.05,  $n$ =3 independent plating. One-way ANOVA followed by Bonferroni's multiple comparison test.

(B) Bar graph representing normalized average value of neuronal ATP/ATP+ADP ratio in basal condition, on dynasore (100 $\mu$ M) treatment for 30 minutes, on Glutamate (25 $\mu$ M) treatment for 5 minutes and on glutamate treatment along with dynasore pre-treatment. \* $p$ <0.05,  $n$ =3-6 independent plating. One-way ANOVA followed by Bonferroni's multiple comparison test.

22 (C) Quantification showing the effect of treatment of anisomycin, cycloheximide and MPEP on  
23 synaptic ATP level measured from cortical synaptoneurosomes. Data = mean  $\pm$  SEM with  
24 scattered data points.

25 **Supplementary Figure 2:**

26

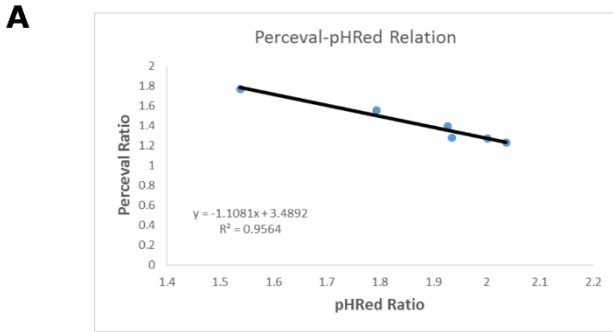

28

29

30

**B**

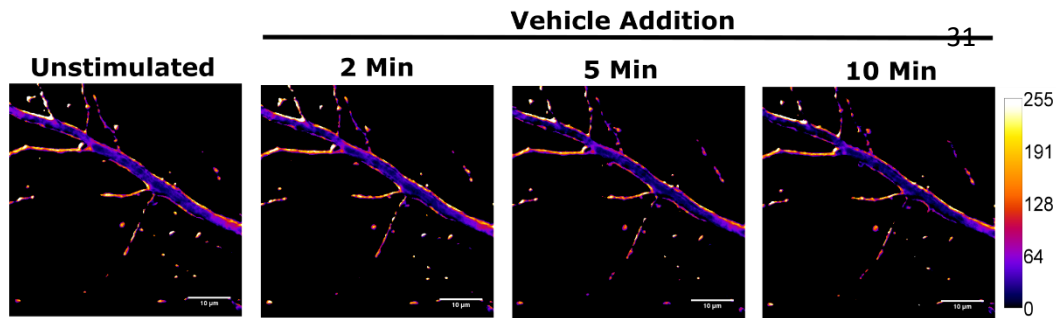

31

**C**

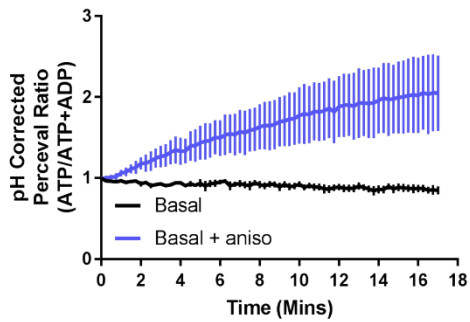

38

39

40

41

**D** 35

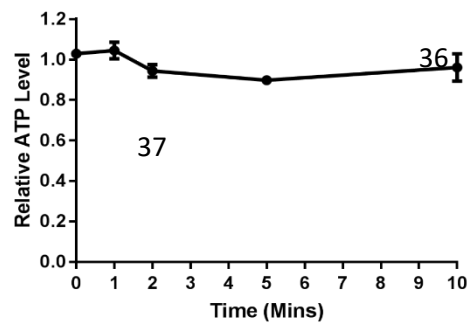

42 **Sensor Calibration and Basal ATP Measurement.** (Related to Figure 2)

43 **(A)** Graph depicting a linear relationship was established between the PercevalHR fluorescence  
44 ratio and the pH-Red fluorescence ratio using  $\text{NH}_4\text{Cl}$  pre-pulse method following method  
45 established previously (Pederson et. al, 1998, Tantama et. al, 2013). Briefly a gradient of 5-  
46 15mM  $\text{NH}_4\text{Cl}$  solution was applied to allow the changes in intracellular pH in a short period of  
47 time to avoid any metabolic stress. Changes in PercevalHR fluorescence was measured along  
48 with pH-Red fluorescence and the linear relation was used to remove pH bias approximately.

49 **(B)** Representative dendrite showing the temporal profile of PercevalHR fluorescence  
50 (ATP/ADP) in unstimulated condition. Scale=10 $\mu\text{M}$ .

51 **(C)** Average time traces showing the change in the dendritic ATP/ADP ratio on unstimulated  
52 condition in presence or absence of anisomycin. Data= mean  $\pm$  SEM.  $n \geq 3$  cells from independent  
53 platings per group.

54 **(D)** Quantification showing the changes in synaptic ATP level on unstimulated conditions. Data=  
55 mean  $\pm$  SEM.  $n = 4$  animals.

56

57

58

59

60

61

62

63

64 **Supplementary Figure 3:**

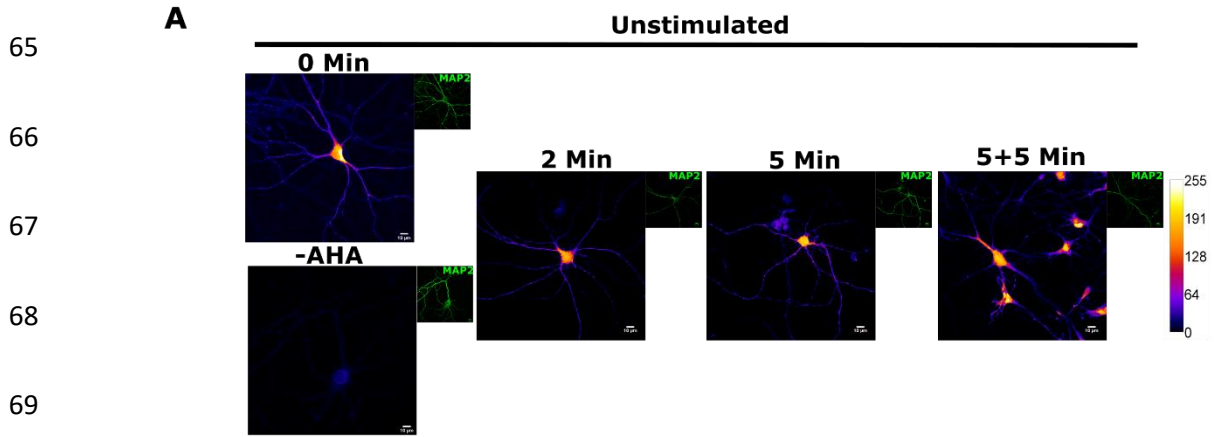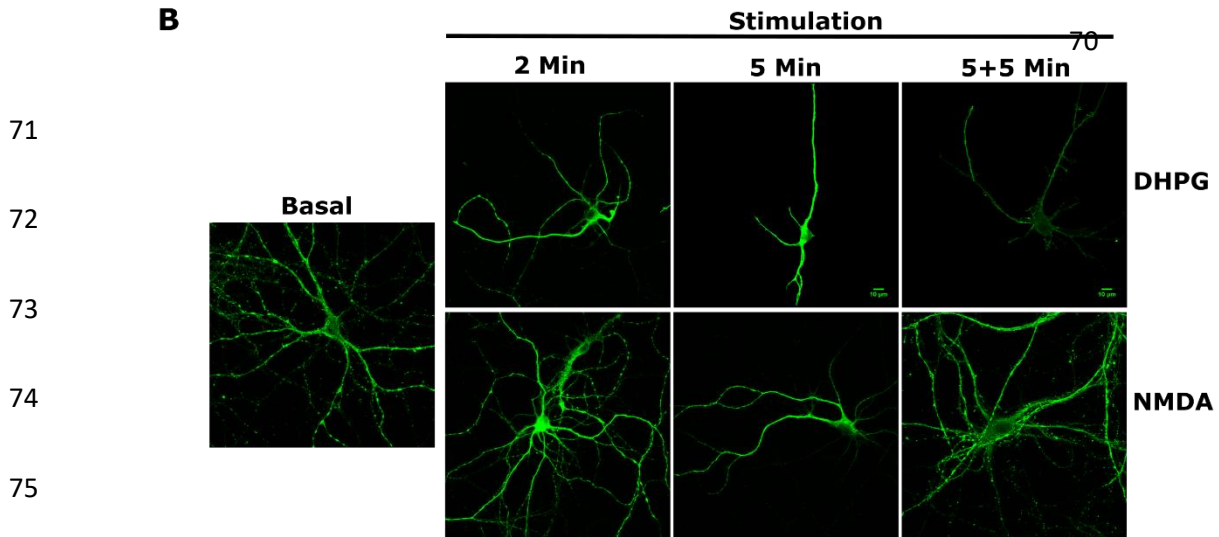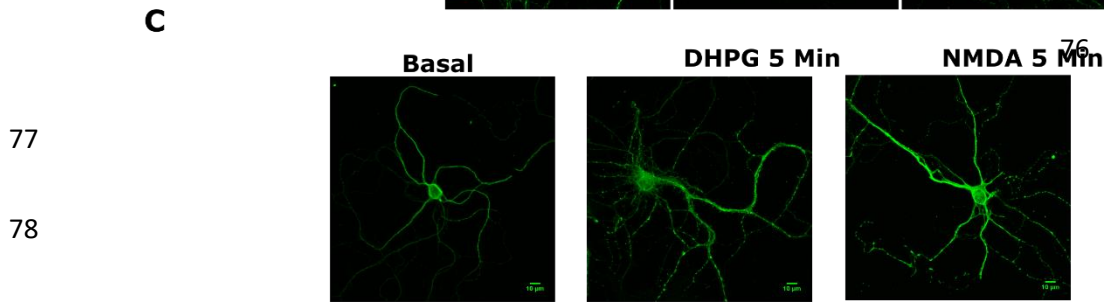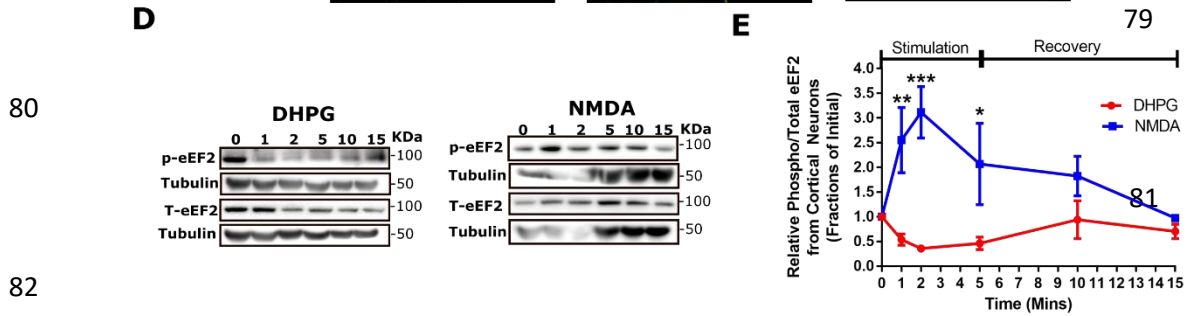

83 **Translation Kinetics.** (Related to Figure 3)

84 **(A)** Representative images showing newly synthesized proteins visualized through FUNCAT  
85 metabolic labeling (pseudo-colored) in cortical neurons at various time points in unstimulated  
86 condition. Absence of AHA while metabolic labeling was used as a negative control. MAP2B  
87 immunolabeling (green, inset) was used for identifying neurons and intensity was used for  
88 normalization. The average trace quantification and data point distribution for unstimulated  
89 cells have been presented in Figure 3C and 3D. Scale=10 $\mu$ M.

90 **(B)** Representative images showing immunolabeling of MAP2B (green) in cortical neurons at  
91 various time points following DHPG and NMDA treatment for the cells used for FUNCAT intensity  
92 quantification. Scale=10 $\mu$ M.

93 **(C)** Representative images showing immunolabeling of MAP2B (green) in cortical neurons in  
94 basal condition and DHPG and NMDA treatment for 5 minutes for the cells used for p-eEF2  
95 quantification. Scale=10 $\mu$ M.

96 **(D)** Representative immunoblots describing changes in phospho-eEF2 and total-eEF2 levels at  
97 various time points after DHPG (50 $\mu$ M) and NMDA (20 $\mu$ M) treatment to cultured cortical neurons.  
98 Note in each case phospho and total eEF2 levels were normalized individually to tubulin before  
99 calculating the ratio.

100 **(E)** Line graph showing average value for neuronal phospho/total ratio of eEF2 at various time  
101 points after DHPG and NMDA treatment and 5 minutes and 10 minutes after recovery. Data:  
102 mean +/- SEM, \*p<0.05, \*\*p<0.01, \*\*\*p<0.001, n= 3 animals per group. Two Way ANOVA followed  
103 by Bonferroni's multiple comparison test.

104

105

106 **Supplementary Figure 4:**

107

108

109

110

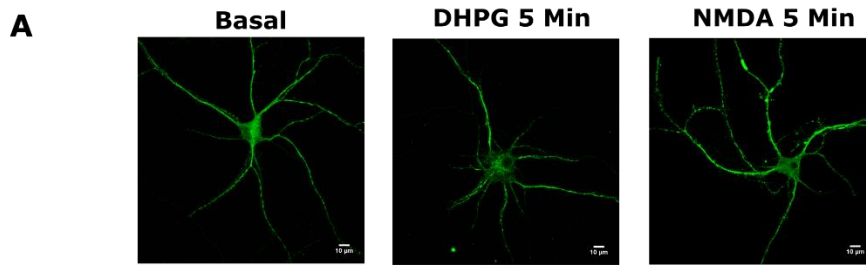

111

112

113

114

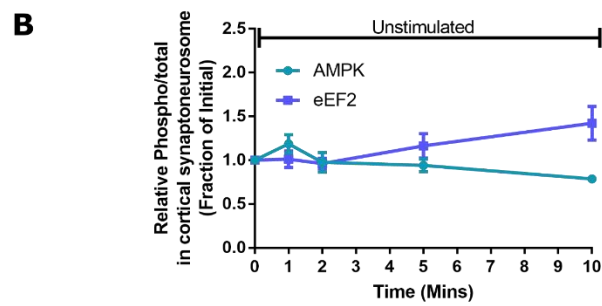

115

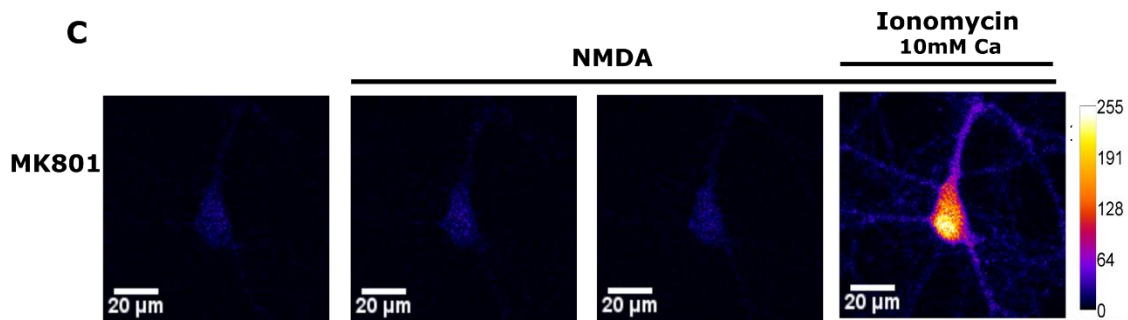

117

118

119

120

121

122

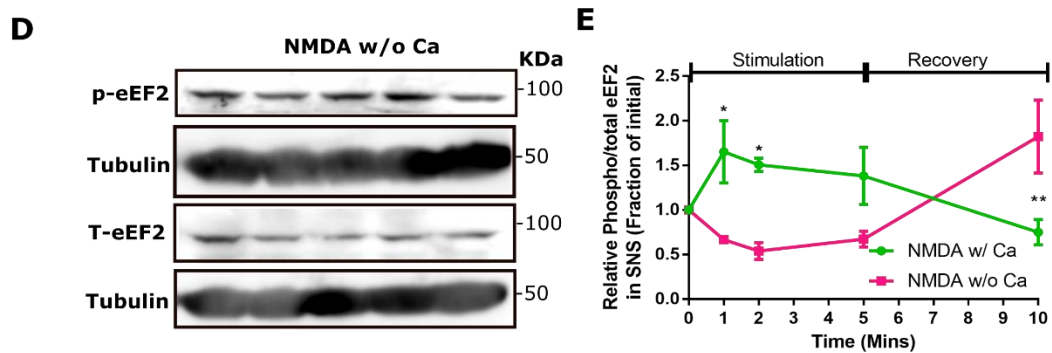

123

124

125 **Baseline eEF2 phosphorylation and Characterization of NMDAR dependent Ca<sup>2+</sup> entry.**

126 (Related to Figure 4 and Figure 5)

127 **(A)** Representative images showing immunolabeling of MAP2B (green) in cortical neurons in  
128 basal condition and DHPG and NMDA treatment for 5 minutes for the cells used for p-AMPK  
129 quantification. Scale=10μM.

130 **(B)** Line graph showing average value for synaptic phospho/total ratio of eEF2 and AMPK at  
131 various time points after DHPG and NMDA treatment and 5 minutes after recovery in cortical  
132 synaptoneuroosomes. Data: mean +/- SEM, n ≥ 2 animals per group. Two Way ANOVA followed by  
133 Bonferroni's multiple comparison test.

134 **(C)** Representative images depicting intracellular Ca<sup>2+</sup> levels (Pseudo-colored) of a cortical  
135 neuron before stimulation, immediately (15s) after NMDA (20μM) treatment, at a later time  
136 point (300sec) after NMDA treatment and after ionomycin treatment along with 10mM Ca<sup>2+</sup> in  
137 presence MK-801. Scale=20μM.

138 **(D)** Representative immunoblots describing changes in phospho-eEF2 and total-eEF2 levels at  
139 various time points after NMDA (40μM) treatment to cortical synaptoneuroosomes in presence or  
140 absence of extracellular Ca<sup>2+</sup>. Note in each case phospho and total AMPK levels were normalized  
141 individually to tubulin before calculating the ratio.

142 **(E)** Line graph showing average value for synaptic phospho/total ratio of eEF2 at various time  
143 points after NMDA treatment and 5 minutes after recovery in presence or absence of Ca<sup>2+</sup>. Data:  
144 mean +/- SEM, \*p<0.05, \*\*p<0.01, n ≥ 4 animals per group. Two Way ANOVA followed by  
145 Bonferroni's multiple comparison test.

146

147

148 **Supplementary Figure 5:**

149

150

151

152

153

154

155

156

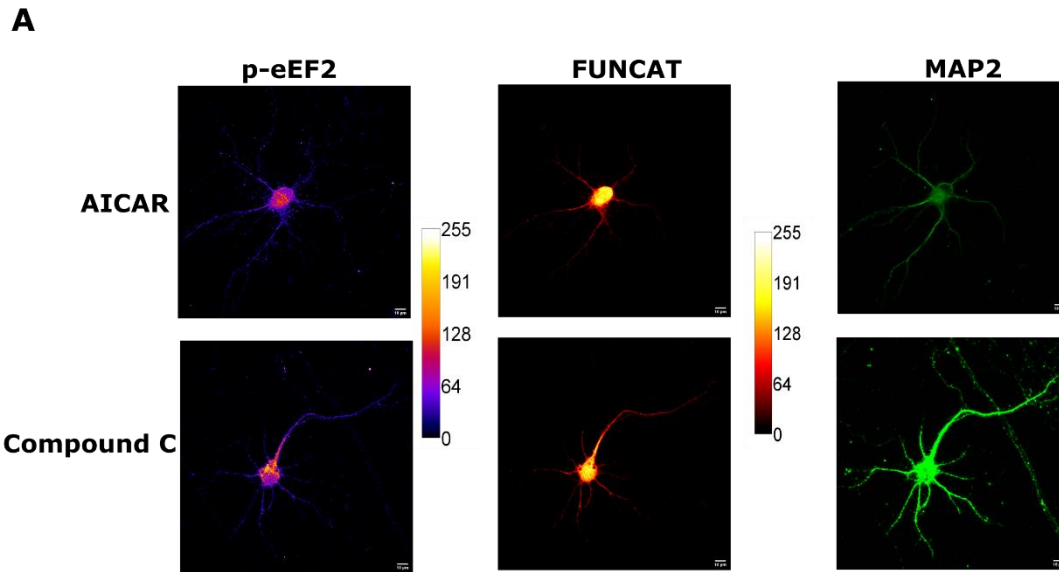

157

158

159

160

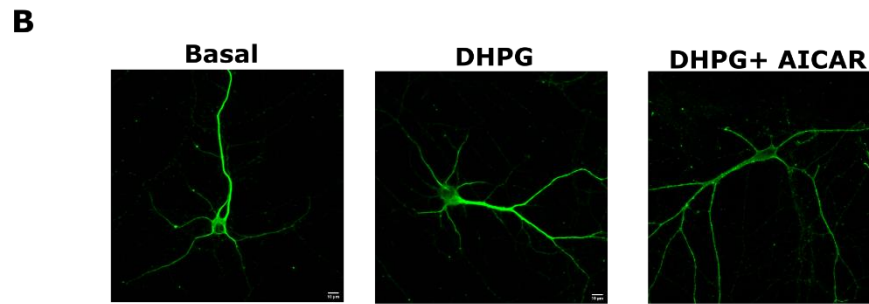

161

162

163

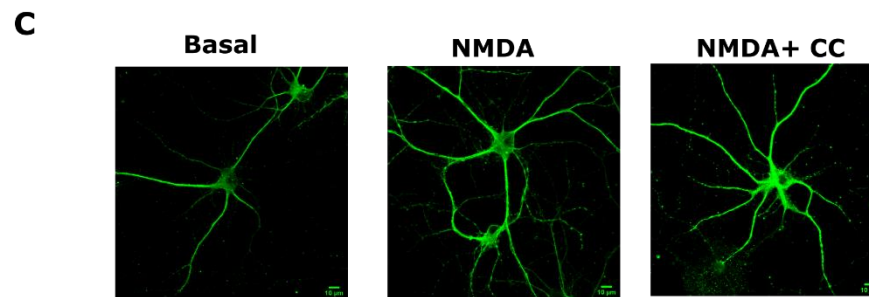

164

165 **AMPK perturbations: (related to figure 6)**

166 **(A)** Representative images showing phospho-eEF2 immunolabeling (Pseudo-colored), newly

167 synthesized protein through FUNCAT metabolic labeling and MAP2B immunolabeling in cortical



168 neurons on AICAR (1mM) treatment and Compound C (10 $\mu$ M) treatment for 1 hour. MAP2B  
169 immunolabeling was used for identifying neurons and intensity was used for normalization.  
170 Scale=10 $\mu$ M.

171 **(B)** Representative images showing immunolabeling of MAP2B (green) in cortical neurons in  
172 basal condition and on DHPG treatment for 5 minutes in presence or absence of AICAR for the  
173 cells used for p-eEF2 and FUNCAT quantification. Scale=10 $\mu$ M.

174 **(C)** Representative images showing immunolabeling of MAP2B (green) in cortical neurons in  
175 basal condition and on NMDA treatment for 5 minutes in presence or absence of Compound C  
176 for the cells used for p-eEF2 and FUNCAT quantification. Scale=10 $\mu$ M.

177

178
